# Supplementary material
Source: PubMed Central journal article supplement (PMC7654323)
Supplement: mmc1.pdf [file mmc1.pdf]

## Supplemental Information

### **Baricitinib treatment resolves lower-airway macrophage inflammation and neutrophil recruitment in SARS-CoV-2-infected rhesus macaques**

**Timothy N. Hoang, Maria Pino, Arun K. Boddapati, Elise G. Viox, Carly E. Starke, Amit A. Upadhyay, Sanjeev Gumber, Michael Nekorchuk, Kathleen Busman-Sahay, Zachary Strongin, Justin L. Harper, Gregory K. Tharp, Kathryn L. Pellegrini, Shannon Kirejczyk, Keivan Zandi, Sijia Tao, Tristan R. Horton, Elizabeth N. Beagle, Ernestine A. Mahar, Michelle Y.H. Lee, Joyce Cohen, Sherrie M. Jean, Jennifer S. Wood, Fawn Connor-Stroud, Rachelle L. Stammen, Olivia M. Delmas, Shelly Wang, Kimberly A. Cooney, Michael N. Sayegh, Lanfang Wang, Peter D. Filev, Daniela Weiskopf, Guido Silvestri, Jesse Waggoner, Anne Piantadosi, Sudhir P. Kasturi, Hilmi Al-Shakhshir, Susan P. Ribeiro, Rafick P. Sekaly, Rebecca D. Levit, Jacob D. Estes, Thomas H. Vanderford, Raymond F. Schinazi, Steven E. Bosinger, and Mirko Paiardini**

**Table S1. Macaque characteristics and treatment group, Related to Figure 1.** Animal ID in manuscript and assignment. Age in months and weight at time of infection. Treatment group assignment. The four uninfected control animals were historical samples that were only used for IHC staining in **Figure S2**. Annotated symbol in figures.

| Animal ID | Animal Name | Sex | Age (months) at Infection | Weight (kgs) at Infection | Treatment   | Annotated Symbol |
|-----------|-------------|-----|---------------------------|---------------------------|-------------|------------------|
| RM1       | RAAt11      | M   | 166                       | 10.98                     | Baricitinib | ○                |
| RM2       | RLf10       | M   | 201                       | 12.96                     | Baricitinib | □                |
| RM3       | RVf12       | F   | 155                       | 9.63                      | Baricitinib | △                |
| RM4       | 7_141       | F   | 155                       | 9.51                      | Baricitinib | ◇                |
| RM5       | 06_112      | F   | 167                       | 8.71                      | Untreated   | ●                |
| RM6       | RQv9        | M   | 204                       | 14.86                     | Untreated   | ■                |
| RM7       | 5_215       | F   | 176                       | 8.44                      | Untreated   | ▲                |
| RM8       | RHz12       | M   | 141                       | 11.77                     | Untreated   | ◆                |
|           | P378        | F   | 36-60                     | 8.71                      | Uninfected  | ●                |
|           | P377        | F   | 36-60                     | 14.86                     | Uninfected  | ■                |
|           | P376        | F   | 36-60                     | 8.44                      | Uninfected  | ▲                |
|           | P375        | M   | 36-60                     | 11.77                     | Uninfected  | ◆                |

**Table S2, Cage-side assessment scoring sheet, Related to Figure 1.** The table was modified from a previous NHP influenza A virus study to include cage-side assessments relevant to COVID-19 and respiratory rates for cynomolgus macaques. The highest sum of scores for an animal determined the severity of disease. Disease severity was classified as no illness (0-4), mild (5-9), moderate (10-15), severe (>16). BPM = breaths per minute.

| <b>Cage-Side Assessment</b>     |                                                                                                                                                        |              |  |
|---------------------------------|--------------------------------------------------------------------------------------------------------------------------------------------------------|--------------|--|
| <b>Parameter</b>                | <b>Description</b>                                                                                                                                     | <b>Score</b> |  |
| Responsiveness and recumbency   | Normal - bright, alert, responsive                                                                                                                     | 0            |  |
|                                 | Mild - slightly depressed, acts disinterested when personnel in room, lying down in cage but gets up when approached                                   | 2            |  |
|                                 | Moderate/obtunded - non-responsive, very disinterested in personnel, hunched or lying down, will get up when prodded, pinched, or similarly stimulated | 4            |  |
|                                 | Severe/comatose - lying down completely unresponsive to stimuli                                                                                        | 6            |  |
| Discharges                      | Nasal or ocular                                                                                                                                        | 2            |  |
|                                 | Nasal and ocular                                                                                                                                       | 4            |  |
| Skin                            | Rash                                                                                                                                                   | 1            |  |
| Respiration, dyspnea, and cough | Normal - no apparent changes in breathing, 30-54 BPM, and no cough                                                                                     | 0            |  |
|                                 | Mild - slightly increased effort breathing, 55-65 BPM, or mild cough                                                                                   | 2            |  |
|                                 | Moderate - obvious difficulty breathing, 66-80 BPM, or apparent cough                                                                                  | 4            |  |
|                                 | Severe - respirations labored, open mouth breathing, abdominal breathing, >80 BPM, cyanosis, or haemoptysis                                            | 6            |  |
| Food consumption                | 100% of chow and enrichment food consumed                                                                                                              | 0            |  |
|                                 | 10-25% of chow remaining                                                                                                                               | 1            |  |
|                                 | 25-50% of chow remaining, possibly some enrichment food remaining                                                                                      | 2            |  |
|                                 | >50% of chow remaining, some or all enrichment food remaining                                                                                          | 3            |  |
|                                 | Normal                                                                                                                                                 | 0            |  |

|                                                                                                   |                          |   |  |
|---------------------------------------------------------------------------------------------------|--------------------------|---|--|
| Fecal consistency                                                                                 | Soft                     | 1 |  |
|                                                                                                   | Fluid                    | 2 |  |
|                                                                                                   | Fluid and profuse amount | 3 |  |
| <b>Total</b>                                                                                      |                          |   |  |
| <b>Notes</b> <i>(any observed sneezing, vomit, conjunctival erythema, or other abnormalities)</i> |                          |   |  |

**Table S3. Physical examination under anesthesia scoring criteria, Related to Figure 1.**

Physical examinations were performed whenever an animal was anesthetized. The highest sum of scores for an animal determined the severity of disease. Disease severity was classified as no illness (0-2), mild (3-7), moderate (8-13), severe (>13). BPM = breaths per minute.

| Physical Examination Under Anesthesia                    |                                                  |       |  |
|----------------------------------------------------------|--------------------------------------------------|-------|--|
| Parameter                                                | Description                                      | Score |  |
| Rectal temperature<br>(taken immediately after sedation) | Normal (37.0-38.9C)                              | 0     |  |
|                                                          | Low grade fever (39-39.5C)                       | 2     |  |
|                                                          | Fever (>39.5C)                                   | 4     |  |
| Heart rate and blood pressure                            | Normal (** BPM, **/**)                           | 0     |  |
|                                                          | Mild tachycardia (** BPM), normotensive          | 1     |  |
|                                                          | Moderate tachycardia (** BPM), normotensive      | 2     |  |
|                                                          | Severe tachycardia (** BPM), hypotensive (**/**) | 3     |  |
| Respiratory rate                                         | Normal - 30-54 BPM                               | 0     |  |
|                                                          | Mild tachypnea- 55-65 BPM                        | 2     |  |
|                                                          | Moderate tachypnea - 66-80 BPM                   | 4     |  |
|                                                          | Severe tachypnea - >80 BPM                       | 6     |  |
| SpO <sub>2</sub>                                         | Normal (95-100%)                                 | 0     |  |
|                                                          | Mildly decreased (90-94%)                        | 1     |  |
|                                                          | Moderately decreased (87-89)                     | 2     |  |
|                                                          | Severely decreased (<87)                         | 3     |  |
|                                                          | Normal (0-3% loss)                               | 0     |  |

|                                                                                                                                 |                                                     |   |  |
|---------------------------------------------------------------------------------------------------------------------------------|-----------------------------------------------------|---|--|
| Body weight                                                                                                                     | Mild (4-9% loss)                                    | 1 |  |
|                                                                                                                                 | Moderate (10-16% loss)                              | 2 |  |
|                                                                                                                                 | Severe (>16% loss)                                  | 3 |  |
| Dehydration                                                                                                                     | Normal skin turgor, moist mucous membranes          | 0 |  |
|                                                                                                                                 | Skin tenting or dry mucous membranes                | 1 |  |
|                                                                                                                                 | Skin tenting and dry mucous membranes               | 2 |  |
|                                                                                                                                 | Skin tenting, dry mucous membranes, and sunken eyes | 3 |  |
| <b>Total</b>                                                                                                                    |                                                     |   |  |
| <b>Notes</b> ( <i>auscultation findings if applicable, conjunctival erythema, palpable masses, or any other abnormalities</i> ) |                                                     |   |  |
